# Supplementary material for: An assessment of potential causal links between deglaciation and eruption rates at arc volcanoes
Source: Frontiers journal article supplement (doi:10.3389/feart.2023.1082342), 2023-04-12
Supplement: Data_Sheet_1.xlsx [file Data_Sheet_1.xlsx]

## Sheet: AK_Kaguyak
Source - Fierstein and Hildreth (2008)
Unit	age_ka	vol_km3	cum_vol_km3
Eastern_Edifice_Pkg1	300.4	2.8533	2.8533
Dome_2020	260.208	0.605653	3.45895
Eastern_Edifice_Pkg2	200.267	0.39031	3.84926
Dome_1255	173.241	0.0403769	3.88964
Knob_730_and_remnant_outlier	120.576	0.0672948	3.95693
Dome_2315	99.4403	0.39031	4.34724
Eastern_Edifice_Pkg3	59.5949	0.269179	4.61642
Eastern_Edifice_Pkg4	54.7441	0.25572	4.87214
Central_Vent_and_West_Dome	50.2399	0.121131	4.99327
Northern_Edifice	30.8369	0.51144	5.50471
Southern_Edifice	29.451	0.0538358	5.55855
BB	6.23667	0	5.55855
CFE	5.89019	2.31494	7.87349
intracaldera_domes	3.8113	0.13459	8.00808

## Sheet: AL_Seguam
Source - Jicha and Singer (2006)
age_ka	vol_km3	cum_vol_km3
318.3	0	0
152.415	8.62275	8.62275
130.948	2.39521	11.018
99.1055	7.66467	18.6826
27.907	48.5749	67.2575
9.30233	1.1497	68.4072
2.50447	2.10778	70.515
0	8.23952	78.7545

## Sheet: CA_Mazama
Source - Bacon and Lanphere (2006)
Unit	age_ka	vol_km3	cum_vol_km3
pre_ds	430	0	0
ds	421	5.5	5.5
apn	403	0.41	5.91
dpn	402	0.026	5.936
db	370	2.5	8.436
ak	322	5.4	13.836
dr	318	2.4	16.236
arv	302	0.93	17.166
dm_af	276	1.89	19.056
aa	251	11	30.056
ac	238	1.2	31.256
dg	235	0.46	31.716
ag	224	0.27	31.986
dcn	216	0.61	32.596
awe	215	0.13	32.726
amv	172	0.021	32.747
ar	159	0.18	32.927
alb	155	0.026	32.953
all	143	6.1	39.053
am	131	0.71	39.763
dpt	120	0.16	39.923
acr	118	0.66	40.583
alu	117	2.2	42.783
dsb	116	0.35	43.133
dpe	111	0.3	43.433
abl	102	0.24	43.673
asc	98	0.069	43.742
apw	95	0.014	43.756
arw	84	0.32	44.076
bs	79	0.003	44.079
ad	75	1.4	45.479
agc	72	1.3	46.779
dc_dcp	71	3.8	50.579
bh_aww	70	4.93	55.509
dlp	68	1	56.509
ah	61	0.51	57.019
atw	55	0.27	57.289
dwf	50	0.3	57.589
als_apu	47	0.666	58.255
asb	43	0.52	58.775
dv	35	0.39	59.165
mw	34	0.003	59.168
re_rep	27	2.28	61.448
ab_rbb	24	0.135	61.583
rs	18	0.051	61.634
rh_rhp	9	3.55	65.184
cd	8	50	115.184
ae_amc_apc_aw	7	4.052	119.236
r	5	0.074	119.31

## Sheet: CA_North_Sister
Source - Calvert et al. (2018)
Unit	age_ka	vol_km3	cum_vol_km3
pre_bbd	400	0	0
bbd	300	0.02	0.02
bac	130.1	0.003	0.023
mns	121.3	3	3.023
myw	100	0	3.023
mns	84.5	1.5	4.523
myl	75	0.27	4.793
mey_mst	74	0.5	5.293
mns	71.7	1.5	6.793
mfy_mys	65	0.06	6.853
mwa	59.8	0.01	6.863
mns	55.9	1	7.863
mwy	50	0.006	7.869
mns	47	1	8.869
awa	25.6	0.01	8.879
mps	25.4	0.18	9.059
anh	21.4	0.003	9.062
mnt	20.6	0.016	9.078
mml_mmn_mpn	20	0.323	9.401

## Sheet: CA_Middle_Sister
Source - Calvert et al. (2018)
Unit	age_ka	vol_km3	cum_vol_km3
mls	150	0.004	0.004
mnf	48.5	0.001	0.005
aoc	47.1	1.13	1.135
roc	38.4	0.36	1.495
aef	37.6	0.001	1.496
mhd	37.4	0.008	1.504
dlc	28.5	0.002	1.506
mhl	28.3	0.001	1.507
alc	27.6	0.54	2.047
asw	24.9	0.001	2.048
dss	24.9	0.024	2.072
adl	24.6	0.42	2.492
awc	23.8	0.025	2.517
awm	23.5	0.006	2.523
awr	23.5	0.006	2.529
mcl	23.5	0.36	2.889
ahl	22.5	0.014	2.903
mrg	22	0.011	2.914
dlp	21.8	0.185	3.099
dsn	21.5	0.015	3.114
mnh	21.5	0	3.114
mmm	21	0.008	3.122
mmi	20.5	0.002	3.124
mms	20.5	1.09	4.214
mmt	20.5	0.004	4.218
dhr	19.4	0.001	4.219
dms	19	0.001	4.22
dbh	18.7	0.325	4.545
mss	18	0	4.545
dsw	17.1	0.045	4.59
dig	14.6	0.197	4.787

## Sheet: CA_South_Sister
Source - Fierstein et al. (2011); Calvert et al. (2018)
Unit	age_ka	vol_km3	cum_vol_km3
pre_rsw	52	0	0
rsw	51.4	0.19	0.19
rmc	48.2	0.18	0.37
rsf	36.4	0.6	0.97
rse	35.6	0.18	1.15
rdh	35.4	1.45	2.6
aph	34.6	0.001	2.601
aph'	34.6	0.003	2.604
asn	34.5	0.19	2.794
dml	34.2	0.37	3.164
dwp	34.2	0.14	3.304
rpg	33.4	0.007	3.311
ddl	32.9	0.79	4.101
dpg	32.9	0.005	4.106
rgl	32.4	0.69	4.796
dgc	32.1	0.3	5.096
apc	31.9	0.18	5.276
rpc	31.9	0.019	5.295
dcg	31.2	1.31	6.605
rkb	31	0.76	7.365
alh	30.9	0.078	7.443
ahc	30.5	0.05	7.493
dmw	30	0.25	7.743
drm	29.2	0.72	8.463
dgl	28.5	0.38	8.843
dmn	28.2	0.12	8.963
dcn	28	0.034	8.997
dkb	27.8	0.204	9.201
alg	27.7	0.3	9.501
adh	27.6	0.015	9.516
als	27.6	0.02	9.536
dwl	27.6	0.045	9.581
aeg	27.5	0.7	10.281
ahi	27	0.01	10.291
dcl	26.4	0.13	10.421
rsc	25.8	0.15	10.571
dbl	25.4	0.001	10.572
dlg	25.3	0.044	10.616
rct	24.4	0.31	10.926
awf	24.1	0.3	11.226
des	23.9	0.077	11.303
dnt	23.9	0.001	11.304
mtp	22.7	0.006	11.31
rrm	2.3	0.53	11.84
rdc	2	0.32	12.16

## Sheet: CA_Adams
Source - Hildreth and Lanphere (1994)
age_ka	vol_km3	cum_vol_km3
254.417	0	0
248.057	3.1746	3.1746
166.431	0	3.1746
157.951	2.1164	5.29101
126.148	1.0582	6.34921
106.007	10.582	16.9312
63.6042	1.5873	18.5185
55.1237	4.2328	22.7513
37.1025	1.5873	24.3386
18.0212	37.037	61.3757
12.7208	3.1746	64.5503
2.12014	1.5873	66.1376

## Sheet: CA_Baker
Source - Hildreth et al. (2003)
age_ka	vol_km3	cum_vol_km3
492.919	0	0
457.711	0.792602	0.792602
373.424	10.568	11.3606
360.621	1.321	12.6816
317.944	6.07662	18.7583
309.408	0.792602	19.5509
281.668	4.22721	23.7781
206.984	0	23.7781
183.511	1.0568	24.8349
145.102	0	24.8349
134.433	0.792602	25.6275
114.161	0.264201	25.8917
100.291	0.528402	26.4201
90.6887	0.264201	26.6843
84.2871	0.792602	27.4769
73.6178	0.264201	27.7411
64.0155	1.84941	29.5905
42.677	1.5852	31.1757
8.5354	13.4742	44.6499
0	0.528402	45.1783

## Sheet: EC_Antisana
Source - Hall et al. (2017)
Unit	age_ka	vol_km3	cum_vol_km3
pre_Antisana_I	400	0	0
Antisana_I	378	5.4	5.4
Antisana_II	190	33	38.4
pre_Antisana_III	15	0	38.4
Antisana_III	0	2.2	40.6

## Sheet: EC_Chimborazo
Source - Samaniego et al. (2012)
Unit	age_ka	vol_km3	cum_vol_km3
pre_Basal_Edifice	120	0	0
Basal_Edifice	60	58.4	58.4
Intermediary_Edifice	35	17.75	76.15
Young_Cone	0	5.15	81.3

[truncated: 10 more sheets: EC_Iliniza, EC_Pichincha, EC_Tungurahua, PR_Ampato-Sabancaya, CH_Antuco-Sierra Velluda, CH_Calbuco, CH_Parinacota, CH_Puyehue-Cordon Caulle, CH_Tatara-San Pedro, NZ_Tongariro]
